# Supplementary material for: Artificial Intelligence for Prognostic Scores in Oncology: a Benchmarking Study
Source: Front Artif Intell. 2021 Apr 16;4:625573. doi: 10.3389/frai.2021.625573 (PMC8086599; doi:10.3389/frai.2021.625573)
Supplement: Supplementary file 3 [file table2.xlsx]

## Sheet: C-index per cohort
#Covariates	Model	Acute myeloid leukemia (N=243)		Advanced Endometrial (N=181)		Advanced Melanoma (N=458)		Advanced non-small-cell lung cancer (N=4127)		Bladder cancer (N=593)		Breast cancer (N=69)		Chronic lymphotic leukemia (N=1064)		Diffuse large B-cell lymphoma (N=465)		Follicular cancer (N=209)		Gastric cancer (N=704)		Head and neck cancer (N=552)		Metastatic breast cancer (N=1660)		Metastatic coloretal cancer (N=1893)		Metastatic renal cell carcinoma (N=547)		Multiple myeloma (N=814)		Ovarian cancer (N=508)		Pancreatic cancer (N=669)		Small-cell lung cancer (N=501)
		C-index	95% CI	C-index	95% CI	C-index	95% CI	C-index	95% CI	C-index	95% CI	C-index	95% CI	C-index	95% CI	C-index	95% CI	C-index	95% CI	C-index	95% CI	C-index	95% CI	C-index	95% CI	C-index	95% CI	C-index	95% CI	C-index	95% CI	C-index	95% CI	C-index	95% CI	C-index	95% CI
27 Covariates	ROPRO	0.665684	[0.626, 0.703]	0.706672	[0.657, 0.753]	0.699579	[0.669, 0.727]	0.680334	[0.671, 0.689]	0.702852	[0.678, 0.726]	0.656628	[0.553, 0.752]	0.685069	[0.66, 0.711]	0.749858	[0.714, 0.784]	0.783006	[0.704, 0.853]	0.64563	[0.622, 0.668]	0.653043	[0.627, 0.679]	0.647965	[0.629, 0.665]	0.688425	[0.675, 0.702]	0.671943	[0.644, 0.701]	0.711826	[0.683, 0.738]	0.723788	[0.696, 0.752]	0.692944	[0.673, 0.712]	0.691791	[0.667, 0.715]
	Cox + Elastic Net	0.636492	[0.598, 0.677]	0.705697	[0.656, 0.748]	0.695736	[0.667, 0.725]	0.678684	[0.67, 0.687]	0.698586	[0.676, 0.721]	0.646791	[0.539, 0.745]	0.655695	[0.627, 0.677]	0.752148	[0.717, 0.784]	0.785089	[0.695, 0.857]	0.646705	[0.624, 0.669]	0.657986	[0.632, 0.683]	0.639581	[0.622, 0.657]	0.68259	[0.668, 0.696]	0.676632	[0.645, 0.704]	0.686854	[0.656, 0.716]	0.708446	[0.676, 0.737]	0.68713	[0.664, 0.707]	0.689865	[0.664, 0.714]
	Cox + Lasso	0.6321	[0.59, 0.672]	0.704261	[0.653, 0.747]	0.696266	[0.668, 0.725]	0.679279	[0.671, 0.688]	0.699525	[0.676, 0.723]	0.643891	[0.542, 0.748]	0.653227	[0.627, 0.68]	0.750437	[0.717, 0.782]	0.787815	[0.704, 0.859]	0.646256	[0.624, 0.669]	0.657815	[0.633, 0.683]	0.639689	[0.621, 0.656]	0.682097	[0.667, 0.696]	0.675923	[0.648, 0.704]	0.6862	[0.654, 0.715]	0.708128	[0.678, 0.737]	0.686464	[0.667, 0.708]	0.689611	[0.664, 0.711]
	Cox + Ridge regression	0.639475	[0.598, 0.68]	0.704379	[0.653, 0.752]	0.696778	[0.669, 0.726]	0.67936	[0.67, 0.689]	0.699969	[0.676, 0.722]	0.644414	[0.541, 0.739]	0.657953	[0.632, 0.683]	0.751646	[0.716, 0.786]	0.783357	[0.695, 0.854]	0.647655	[0.626, 0.67]	0.657201	[0.633, 0.682]	0.641565	[0.625, 0.659]	0.683863	[0.67, 0.697]	0.676585	[0.647, 0.705]	0.689555	[0.659, 0.719]	0.70688	[0.675, 0.737]	0.688871	[0.666, 0.71]	0.692939	[0.667, 0.716]
	GB	0.663461	[0.622, 0.704]	0.715846	[0.668, 0.76]	0.691435	[0.662, 0.717]	0.67883	[0.67, 0.687]	0.694818	[0.671, 0.718]	0.663133	[0.559, 0.751]	0.69483	[0.672, 0.719]	0.731222	[0.696, 0.763]	0.815364	[0.739, 0.878]	0.648979	[0.627, 0.67]	0.654354	[0.629, 0.678]	0.648108	[0.632, 0.666]	0.689638	[0.675, 0.703]	0.677662	[0.65, 0.705]	0.726832	[0.699, 0.754]	0.703005	[0.675, 0.734]	0.691396	[0.672, 0.714]	0.690728	[0.666, 0.714]
	RSF	0.699293	[0.661, 0.734]	0.710577	[0.661, 0.754]	0.691243	[0.663, 0.719]	0.682496	[0.674, 0.691]	0.692243	[0.67, 0.716]	0.607831	[0.505, 0.711]	0.696021	[0.672, 0.719]	0.722832	[0.685, 0.759]	0.772446	[0.681, 0.847]	0.652798	[0.629, 0.675]	0.661497	[0.636, 0.685]	0.646239	[0.63, 0.664]	0.688519	[0.674, 0.703]	0.687537	[0.661, 0.712]	0.711385	[0.682, 0.738]	0.699716	[0.668, 0.733]	0.679014	[0.658, 0.701]	0.689263	[0.664, 0.715]
	AE	0.651525	[0.609, 0.688]	0.724833	[0.676, 0.769]	0.680077	[0.649, 0.706]	0.668413	[0.66, 0.678]	0.692659	[0.669, 0.715]	0.634891	[0.536, 0.727]	0.659443	[0.633, 0.686]	0.751523	[0.717, 0.783]	0.782205	[0.7, 0.855]	0.640337	[0.617, 0.664]	0.64924	[0.624, 0.675]	0.628697	[0.611, 0.646]	0.67968	[0.665, 0.693]	0.658445	[0.627, 0.688]	0.688092	[0.66, 0.719]	0.704094	[0.673, 0.732]	0.677265	[0.655, 0.698]	0.700142	[0.675, 0.726]
	DS	0.693603	[0.653, 0.729]	0.70525	[0.655, 0.752]	0.693327	[0.664, 0.722]	0.682191	[0.674, 0.691]	0.707126	[0.686, 0.729]	0.647781	[0.541, 0.748]	0.690318	[0.664, 0.715]	0.751564	[0.717, 0.786]	0.802366	[0.722, 0.864]	0.652816	[0.63, 0.674]	0.661667	[0.635, 0.685]	0.647782	[0.63, 0.664]	0.690896	[0.677, 0.706]	0.688896	[0.66, 0.714]	0.708197	[0.678, 0.736]	0.703204	[0.672, 0.733]	0.688301	[0.668, 0.709]	0.691349	[0.666, 0.717]
	SL	0.678167	[0.64, 0.718]	0.711985	[0.667, 0.758]	0.698809	[0.667, 0.725]	0.68514	[0.676, 0.694]	0.705509	[0.683, 0.728]	0.644542	[0.534, 0.742]	0.692096	[0.667, 0.715]	0.744498	[0.711, 0.778]	0.802494	[0.722, 0.871]	0.653012	[0.632, 0.674]	0.661579	[0.64, 0.686]	0.649157	[0.632, 0.666]	0.692182	[0.678, 0.707]	0.686008	[0.658, 0.713]	0.714202	[0.686, 0.743]	0.710354	[0.679, 0.739]	0.690666	[0.67, 0.712]	0.69356	[0.668, 0.719]
44 Covariates	ROPRO	0.659808	[0.623, 0.701]	0.699915	[0.653, 0.745]	0.700356	[0.672, 0.729]	0.681439	[0.672, 0.69]	0.704017	[0.679, 0.727]	0.679333	[0.571, 0.773]	0.686194	[0.661, 0.711]	0.746986	[0.714, 0.778]	0.787535	[0.695, 0.854]	0.645718	[0.625, 0.665]	0.652739	[0.626, 0.678]	0.650172	[0.633, 0.667]	0.690083	[0.676, 0.704]	0.669469	[0.641, 0.697]	0.710712	[0.683, 0.739]	0.722591	[0.693, 0.753]	0.692426	[0.671, 0.714]	0.690933	[0.667, 0.715]
	Cox + Elastic Net	0.620018	[0.578, 0.662]	0.698486	[0.652, 0.746]	0.698097	[0.668, 0.725]	0.680008	[0.671, 0.688]	0.700022	[0.677, 0.723]	0.657517	[0.557, 0.746]	0.63594	[0.61, 0.661]	0.746038	[0.711, 0.783]	0.791451	[0.709, 0.864]	0.649174	[0.624, 0.674]	0.655101	[0.63, 0.68]	0.641208	[0.623, 0.659]	0.683443	[0.669, 0.698]	0.675582	[0.647, 0.704]	0.689675	[0.659, 0.719]	0.707881	[0.675, 0.74]	0.68556	[0.664, 0.706]	0.690039	[0.664, 0.715]
	Cox + Lasso	0.624664	[0.582, 0.661]	0.702075	[0.655, 0.747]	0.698812	[0.668, 0.726]	0.679964	[0.671, 0.688]	0.70001	[0.676, 0.723]	0.656224	[0.562, 0.75]	0.637769	[0.612, 0.663]	0.747627	[0.712, 0.778]	0.791083	[0.705, 0.857]	0.650149	[0.627, 0.673]	0.655908	[0.63, 0.682]	0.641171	[0.623, 0.657]	0.683311	[0.668, 0.697]	0.674531	[0.645, 0.703]	0.689046	[0.659, 0.718]	0.707519	[0.676, 0.735]	0.686953	[0.665, 0.707]	0.688933	[0.664, 0.713]
	Cox + Ridge regression	0.615922	[0.575, 0.654]	0.702978	[0.657, 0.748]	0.701921	[0.671, 0.729]	0.680974	[0.672, 0.69]	0.700228	[0.675, 0.722]	0.659537	[0.567, 0.744]	0.630343	[0.605, 0.656]	0.744966	[0.709, 0.777]	0.789471	[0.705, 0.864]	0.649227	[0.626, 0.672]	0.657894	[0.629, 0.684]	0.644534	[0.627, 0.663]	0.685229	[0.67, 0.699]	0.678734	[0.649, 0.706]	0.689018	[0.659, 0.716]	0.706226	[0.675, 0.734]	0.685983	[0.665, 0.707]	0.69107	[0.666, 0.716]
	GB	0.665923	[0.624, 0.699]	0.701651	[0.653, 0.745]	0.696197	[0.668, 0.721]	0.681247	[0.673, 0.69]	0.698437	[0.675, 0.722]	0.686368	[0.578, 0.783]	0.690329	[0.664, 0.714]	0.730913	[0.692, 0.768]	0.805411	[0.725, 0.878]	0.658385	[0.636, 0.679]	0.654498	[0.63, 0.679]	0.650463	[0.633, 0.668]	0.690708	[0.677, 0.704]	0.679655	[0.651, 0.707]	0.724241	[0.697, 0.753]	0.700545	[0.671, 0.73]	0.69642	[0.675, 0.716]	0.691402	[0.667, 0.714]
	RSF	0.681977	[0.641, 0.718]	0.702845	[0.657, 0.746]	0.703923	[0.676, 0.731]	0.682982	[0.674, 0.692]	0.693511	[0.671, 0.716]	0.664737	[0.561, 0.759]	0.663996	[0.641, 0.688]	0.723803	[0.687, 0.757]	0.776579	[0.679, 0.863]	0.657617	[0.635, 0.678]	0.663284	[0.638, 0.689]	0.655262	[0.638, 0.671]	0.687915	[0.672, 0.701]	0.68905	[0.659, 0.714]	0.706911	[0.677, 0.733]	0.692923	[0.663, 0.724]	0.679222	[0.656, 0.7]	0.692177	[0.668, 0.718]
	AE	0.633424	[0.593, 0.672]	0.696628	[0.647, 0.74]	0.691249	[0.664, 0.718]	0.672836	[0.664, 0.681]	0.698856	[0.675, 0.721]	0.647953	[0.556, 0.748]	0.64114	[0.616, 0.665]	0.751565	[0.718, 0.783]	0.792282	[0.705, 0.862]	0.648691	[0.625, 0.671]	0.648783	[0.623, 0.674]	0.638222	[0.622, 0.655]	0.680049	[0.666, 0.695]	0.669156	[0.641, 0.696]	0.686767	[0.656, 0.716]	0.7011	[0.668, 0.731]	0.681229	[0.659, 0.704]	0.692351	[0.667, 0.715]
	DS	0.688066	[0.65, 0.729]	0.693344	[0.646, 0.739]	0.69707	[0.67, 0.726]	0.683396	[0.674, 0.692]	0.710871	[0.688, 0.733]	0.667046	[0.572, 0.759]	0.667899	[0.643, 0.693]	0.756132	[0.723, 0.787]	0.795924	[0.713, 0.866]	0.65758	[0.635, 0.677]	0.662311	[0.637, 0.688]	0.64853	[0.632, 0.665]	0.691347	[0.678, 0.706]	0.686634	[0.658, 0.712]	0.704302	[0.676, 0.733]	0.706649	[0.674, 0.736]	0.685483	[0.664, 0.705]	0.692718	[0.667, 0.716]
	SL	0.687107	[0.649, 0.725]	0.701325	[0.655, 0.746]	0.699442	[0.671, 0.727]	0.687111	[0.678, 0.696]	0.711373	[0.688, 0.733]	0.659846	[0.552, 0.751]	0.673106	[0.648, 0.699]	0.749132	[0.714, 0.781]	0.791435	[0.702, 0.867]	0.658085	[0.636, 0.679]	0.665068	[0.64, 0.69]	0.65308	[0.637, 0.67]	0.694233	[0.679, 0.708]	0.689251	[0.661, 0.716]	0.702871	[0.673, 0.731]	0.703236	[0.672, 0.731]	0.686126	[0.664, 0.706]	0.694444	[0.669, 0.721]
88 Covariates	ROPRO	0.660873	[0.622, 0.702]	0.69431	[0.648, 0.742]	0.700294	[0.672, 0.73]	0.677357	[0.669, 0.687]	0.704844	[0.679, 0.728]	0.663676	[0.558, 0.752]	0.684058	[0.658, 0.71]	0.742706	[0.704, 0.777]	0.781509	[0.703, 0.844]	0.644083	[0.623, 0.667]	0.652946	[0.628, 0.678]	0.642884	[0.625, 0.659]	0.687836	[0.673, 0.702]	0.669	[0.638, 0.698]	0.706144	[0.678, 0.732]	0.733595	[0.704, 0.76]	0.691593	[0.671, 0.713]	0.687524	[0.662, 0.713]
	Cox + Elastic Net	0.654201	[0.613, 0.695]	0.686493	[0.638, 0.734]	0.700106	[0.672, 0.727]	0.674336	[0.666, 0.684]	0.697298	[0.674, 0.721]	0.637292	[0.53, 0.738]	0.680291	[0.653, 0.705]	0.73503	[0.702, 0.768]	0.783644	[0.694, 0.86]	0.646787	[0.627, 0.669]	0.6496	[0.624, 0.675]	0.636262	[0.619, 0.654]	0.688012	[0.674, 0.701]	0.666492	[0.635, 0.697]	0.670711	[0.64, 0.7]	0.730041	[0.703, 0.757]	0.679528	[0.658, 0.702]	0.684816	[0.658, 0.709]
	Cox + Lasso	0.655697	[0.612, 0.697]	0.689815	[0.634, 0.738]	0.699576	[0.67, 0.728]	0.674902	[0.666, 0.684]	0.69793	[0.675, 0.719]	0.637195	[0.521, 0.733]	0.679913	[0.655, 0.705]	0.735675	[0.698, 0.77]	0.783343	[0.692, 0.86]	0.647802	[0.625, 0.667]	0.65006	[0.624, 0.676]	0.635472	[0.619, 0.651]	0.687936	[0.674, 0.702]	0.667874	[0.64, 0.696]	0.670051	[0.639, 0.699]	0.72995	[0.701, 0.759]	0.680942	[0.658, 0.701]	0.684466	[0.66, 0.711]
	Cox + Ridge regression	0.642331	[0.598, 0.681]	0.692193	[0.643, 0.738]	0.699624	[0.672, 0.727]	0.673769	[0.665, 0.682]	0.695788	[0.673, 0.719]	0.63568	[0.536, 0.732]	0.6767	[0.652, 0.702]	0.730892	[0.695, 0.764]	0.778438	[0.694, 0.854]	0.649006	[0.627, 0.67]	0.64873	[0.622, 0.673]	0.638358	[0.62, 0.655]	0.68824	[0.674, 0.702]	0.67027	[0.641, 0.699]	0.66568	[0.636, 0.696]	0.726857	[0.698, 0.755]	0.675797	[0.655, 0.697]	0.68554	[0.659, 0.709]
	GB	0.666467	[0.627, 0.708]	0.714336	[0.664, 0.755]	0.698358	[0.67, 0.727]	0.670692	[0.662, 0.68]	0.693618	[0.668, 0.715]	0.638892	[0.521, 0.745]	0.704678	[0.679, 0.729]	0.740599	[0.702, 0.772]	0.78398	[0.706, 0.855]	0.648062	[0.626, 0.669]	0.652474	[0.629, 0.678]	0.642466	[0.626, 0.658]	0.68938	[0.675, 0.703]	0.673083	[0.644, 0.705]	0.690846	[0.661, 0.715]	0.731669	[0.704, 0.759]	0.679158	[0.655, 0.699]	0.684228	[0.659, 0.709]
	RSF	0.660656	[0.619, 0.7]	0.706703	[0.658, 0.749]	0.704539	[0.675, 0.732]	0.672827	[0.664, 0.681]	0.693108	[0.669, 0.716]	0.659702	[0.558, 0.747]	0.677097	[0.652, 0.701]	0.715408	[0.679, 0.751]	0.773654	[0.685, 0.853]	0.649313	[0.626, 0.67]	0.65667	[0.631, 0.68]	0.64991	[0.632, 0.667]	0.683218	[0.669, 0.697]	0.681739	[0.652, 0.71]	0.671275	[0.64, 0.697]	0.707125	[0.678, 0.737]	0.667195	[0.645, 0.69]	0.677212	[0.65, 0.703]
	AE	0.643167	[0.605, 0.683]	0.689124	[0.641, 0.734]	0.692365	[0.661, 0.72]	0.665861	[0.657, 0.675]	0.692715	[0.669, 0.717]	0.626415	[0.516, 0.724]	0.675377	[0.651, 0.7]	0.727085	[0.692, 0.76]	0.771135	[0.68, 0.848]	0.641876	[0.62, 0.663]	0.643302	[0.62, 0.668]	0.63116	[0.613, 0.648]	0.684148	[0.67, 0.698]	0.664959	[0.635, 0.694]	0.663628	[0.634, 0.694]	0.729681	[0.7, 0.759]	0.669634	[0.648, 0.691]	0.686256	[0.661, 0.711]
	DS	0.683648	[0.644, 0.721]	0.695515	[0.647, 0.74]	0.704545	[0.675, 0.731]	0.677456	[0.669, 0.686]	0.702108	[0.679, 0.725]	0.65076	[0.538, 0.751]	0.708505	[0.682, 0.733]	0.741098	[0.707, 0.776]	0.790794	[0.705, 0.861]	0.653807	[0.633, 0.676]	0.655088	[0.63, 0.679]	0.644914	[0.628, 0.662]	0.689388	[0.675, 0.703]	0.683418	[0.656, 0.711]	0.68069	[0.65, 0.711]	0.722496	[0.692, 0.753]	0.674001	[0.652, 0.695]	0.692432	[0.668, 0.717]
	SL	0.69274	[0.654, 0.731]	0.708176	[0.659, 0.753]	0.705449	[0.675, 0.734]	0.681635	[0.673, 0.691]	0.706259	[0.683, 0.728]	0.648753	[0.542, 0.744]	0.702174	[0.677, 0.725]	0.735641	[0.701, 0.771]	0.786115	[0.703, 0.861]	0.656084	[0.634, 0.677]	0.656296	[0.633, 0.68]	0.64853	[0.63, 0.665]	0.693067	[0.679, 0.707]	0.679301	[0.651, 0.707]	0.694088	[0.664, 0.722]	0.726108	[0.697, 0.755]	0.682947	[0.66, 0.704]	0.691957	[0.667, 0.716]

## Sheet: Copy of C-index per cohort
#Covariates	Model	Acute myeloid leukemia (N=243)		Advanced Endometrial (N=181)		Advanced Melanoma (N=458)		Advanced non-small-cell lung cancer (N=4127)		Bladder cancer (N=593)		Breast cancer (N=69)		Chronic lymphotic leukemia (N=1064)		Diffuse large B-cell lymphoma (N=465)		Follicular cancer (N=209)		Gastric cancer (N=704)		Head and neck cancer (N=552)		Metastatic breast cancer (N=1660)		Metastatic coloretal cancer (N=1893)		Metastatic renal cell carcinoma (N=547)		Multiple myeloma (N=814)		Ovarian cancer (N=508)		Pancreatic cancer (N=669)		Small-cell lung cancer (N=501)
		C-index	95% CI	C-index	95% CI	C-index	95% CI	C-index	95% CI	C-index	95% CI	C-index	95% CI	C-index	95% CI	C-index	95% CI	C-index	95% CI	C-index	95% CI	C-index	95% CI	C-index	95% CI	C-index	95% CI	C-index	95% CI	C-index	95% CI	C-index	95% CI	C-index	95% CI	C-index	95% CI
27 Covariates	ROPRO	0.665684	[0.626, 0.703]	0.706672	[0.657, 0.753]	0.699579	[0.669, 0.727]	0.680334	[0.671, 0.689]	0.702852	[0.678, 0.726]	0.656628	[0.553, 0.752]	0.685069	[0.66, 0.711]	0.749858	[0.714, 0.784]	0.783006	[0.704, 0.853]	0.64563	[0.622, 0.668]	0.653043	[0.627, 0.679]	0.647965	[0.629, 0.665]	0.688425	[0.675, 0.702]	0.671943	[0.644, 0.701]	0.711826	[0.683, 0.738]	0.723788	[0.696, 0.752]	0.692944	[0.673, 0.712]	0.691791	[0.667, 0.715]
	Cox + Elastic Net	0.636492	[0.598, 0.677]	0.705697	[0.656, 0.748]	0.695736	[0.667, 0.725]	0.678684	[0.67, 0.687]	0.698586	[0.676, 0.721]	0.646791	[0.539, 0.745]	0.655695	[0.627, 0.677]	0.752148	[0.717, 0.784]	0.785089	[0.695, 0.857]	0.646705	[0.624, 0.669]	0.657986	[0.632, 0.683]	0.639581	[0.622, 0.657]	0.68259	[0.668, 0.696]	0.676632	[0.645, 0.704]	0.686854	[0.656, 0.716]	0.708446	[0.676, 0.737]	0.68713	[0.664, 0.707]	0.689865	[0.664, 0.714]
	Cox + Lasso	0.6321	[0.59, 0.672]	0.704261	[0.653, 0.747]	0.696266	[0.668, 0.725]	0.679279	[0.671, 0.688]	0.699525	[0.676, 0.723]	0.643891	[0.542, 0.748]	0.653227	[0.627, 0.68]	0.750437	[0.717, 0.782]	0.787815	[0.704, 0.859]	0.646256	[0.624, 0.669]	0.657815	[0.633, 0.683]	0.639689	[0.621, 0.656]	0.682097	[0.667, 0.696]	0.675923	[0.648, 0.704]	0.6862	[0.654, 0.715]	0.708128	[0.678, 0.737]	0.686464	[0.667, 0.708]	0.689611	[0.664, 0.711]
	Cox + Ridge regression	0.639475	[0.598, 0.68]	0.704379	[0.653, 0.752]	0.696778	[0.669, 0.726]	0.67936	[0.67, 0.689]	0.699969	[0.676, 0.722]	0.644414	[0.541, 0.739]	0.657953	[0.632, 0.683]	0.751646	[0.716, 0.786]	0.783357	[0.695, 0.854]	0.647655	[0.626, 0.67]	0.657201	[0.633, 0.682]	0.641565	[0.625, 0.659]	0.683863	[0.67, 0.697]	0.676585	[0.647, 0.705]	0.689555	[0.659, 0.719]	0.70688	[0.675, 0.737]	0.688871	[0.666, 0.71]	0.692939	[0.667, 0.716]
	GB	0.663461	[0.622, 0.704]	0.715846	[0.668, 0.76]	0.691435	[0.662, 0.717]	0.67883	[0.67, 0.687]	0.694818	[0.671, 0.718]	0.663133	[0.559, 0.751]	0.69483	[0.672, 0.719]	0.731222	[0.696, 0.763]	0.815364	[0.739, 0.878]	0.648979	[0.627, 0.67]	0.654354	[0.629, 0.678]	0.648108	[0.632, 0.666]	0.689638	[0.675, 0.703]	0.677662	[0.65, 0.705]	0.726832	[0.699, 0.754]	0.703005	[0.675, 0.734]	0.691396	[0.672, 0.714]	0.690728	[0.666, 0.714]
	RSF	0.699293	[0.661, 0.734]	0.710577	[0.661, 0.754]	0.691243	[0.663, 0.719]	0.682496	[0.674, 0.691]	0.692243	[0.67, 0.716]	0.607831	[0.505, 0.711]	0.696021	[0.672, 0.719]	0.722832	[0.685, 0.759]	0.772446	[0.681, 0.847]	0.652798	[0.629, 0.675]	0.661497	[0.636, 0.685]	0.646239	[0.63, 0.664]	0.688519	[0.674, 0.703]	0.687537	[0.661, 0.712]	0.711385	[0.682, 0.738]	0.699716	[0.668, 0.733]	0.679014	[0.658, 0.701]	0.689263	[0.664, 0.715]
	AE	0.651525	[0.609, 0.688]	0.724833	[0.676, 0.769]	0.680077	[0.649, 0.706]	0.668413	[0.66, 0.678]	0.692659	[0.669, 0.715]	0.634891	[0.536, 0.727]	0.659443	[0.633, 0.686]	0.751523	[0.717, 0.783]	0.782205	[0.7, 0.855]	0.640337	[0.617, 0.664]	0.64924	[0.624, 0.675]	0.628697	[0.611, 0.646]	0.67968	[0.665, 0.693]	0.658445	[0.627, 0.688]	0.688092	[0.66, 0.719]	0.704094	[0.673, 0.732]	0.677265	[0.655, 0.698]	0.700142	[0.675, 0.726]
	DS	0.693603	[0.653, 0.729]	0.70525	[0.655, 0.752]	0.693327	[0.664, 0.722]	0.682191	[0.674, 0.691]	0.707126	[0.686, 0.729]	0.647781	[0.541, 0.748]	0.690318	[0.664, 0.715]	0.751564	[0.717, 0.786]	0.802366	[0.722, 0.864]	0.652816	[0.63, 0.674]	0.661667	[0.635, 0.685]	0.647782	[0.63, 0.664]	0.690896	[0.677, 0.706]	0.688896	[0.66, 0.714]	0.708197	[0.678, 0.736]	0.703204	[0.672, 0.733]	0.688301	[0.668, 0.709]	0.691349	[0.666, 0.717]
	SL	0.678167	[0.64, 0.718]	0.711985	[0.667, 0.758]	0.698809	[0.667, 0.725]	0.68514	[0.676, 0.694]	0.705509	[0.683, 0.728]	0.644542	[0.534, 0.742]	0.692096	[0.667, 0.715]	0.744498	[0.711, 0.778]	0.802494	[0.722, 0.871]	0.653012	[0.632, 0.674]	0.661579	[0.64, 0.686]	0.649157	[0.632, 0.666]	0.692182	[0.678, 0.707]	0.686008	[0.658, 0.713]	0.714202	[0.686, 0.743]	0.710354	[0.679, 0.739]	0.690666	[0.67, 0.712]	0.69356	[0.668, 0.719]
44 Covariates	ROPRO	0.659808	[0.623, 0.701]	0.699915	[0.653, 0.745]	0.700356	[0.672, 0.729]	0.681439	[0.672, 0.69]	0.704017	[0.679, 0.727]	0.679333	[0.571, 0.773]	0.686194	[0.661, 0.711]	0.746986	[0.714, 0.778]	0.787535	[0.695, 0.854]	0.645718	[0.625, 0.665]	0.652739	[0.626, 0.678]	0.650172	[0.633, 0.667]	0.690083	[0.676, 0.704]	0.669469	[0.641, 0.697]	0.710712	[0.683, 0.739]	0.722591	[0.693, 0.753]	0.692426	[0.671, 0.714]	0.690933	[0.667, 0.715]
	Cox + Elastic Net	0.620018	[0.578, 0.662]	0.698486	[0.652, 0.746]	0.698097	[0.668, 0.725]	0.680008	[0.671, 0.688]	0.700022	[0.677, 0.723]	0.657517	[0.557, 0.746]	0.63594	[0.61, 0.661]	0.746038	[0.711, 0.783]	0.791451	[0.709, 0.864]	0.649174	[0.624, 0.674]	0.655101	[0.63, 0.68]	0.641208	[0.623, 0.659]	0.683443	[0.669, 0.698]	0.675582	[0.647, 0.704]	0.689675	[0.659, 0.719]	0.707881	[0.675, 0.74]	0.68556	[0.664, 0.706]	0.690039	[0.664, 0.715]
	Cox + Lasso	0.624664	[0.582, 0.661]	0.702075	[0.655, 0.747]	0.698812	[0.668, 0.726]	0.679964	[0.671, 0.688]	0.70001	[0.676, 0.723]	0.656224	[0.562, 0.75]	0.637769	[0.612, 0.663]	0.747627	[0.712, 0.778]	0.791083	[0.705, 0.857]	0.650149	[0.627, 0.673]	0.655908	[0.63, 0.682]	0.641171	[0.623, 0.657]	0.683311	[0.668, 0.697]	0.674531	[0.645, 0.703]	0.689046	[0.659, 0.718]	0.707519	[0.676, 0.735]	0.686953	[0.665, 0.707]	0.688933	[0.664, 0.713]
	Cox + Ridge regression	0.615922	[0.575, 0.654]	0.702978	[0.657, 0.748]	0.701921	[0.671, 0.729]	0.680974	[0.672, 0.69]	0.700228	[0.675, 0.722]	0.659537	[0.567, 0.744]	0.630343	[0.605, 0.656]	0.744966	[0.709, 0.777]	0.789471	[0.705, 0.864]	0.649227	[0.626, 0.672]	0.657894	[0.629, 0.684]	0.644534	[0.627, 0.663]	0.685229	[0.67, 0.699]	0.678734	[0.649, 0.706]	0.689018	[0.659, 0.716]	0.706226	[0.675, 0.734]	0.685983	[0.665, 0.707]	0.69107	[0.666, 0.716]
	GB	0.665923	[0.624, 0.699]	0.701651	[0.653, 0.745]	0.696197	[0.668, 0.721]	0.681247	[0.673, 0.69]	0.698437	[0.675, 0.722]	0.686368	[0.578, 0.783]	0.690329	[0.664, 0.714]	0.730913	[0.692, 0.768]	0.805411	[0.725, 0.878]	0.658385	[0.636, 0.679]	0.654498	[0.63, 0.679]	0.650463	[0.633, 0.668]	0.690708	[0.677, 0.704]	0.679655	[0.651, 0.707]	0.724241	[0.697, 0.753]	0.700545	[0.671, 0.73]	0.69642	[0.675, 0.716]	0.691402	[0.667, 0.714]
	RSF	0.681977	[0.641, 0.718]	0.702845	[0.657, 0.746]	0.703923	[0.676, 0.731]	0.682982	[0.674, 0.692]	0.693511	[0.671, 0.716]	0.664737	[0.561, 0.759]	0.663996	[0.641, 0.688]	0.723803	[0.687, 0.757]	0.776579	[0.679, 0.863]	0.657617	[0.635, 0.678]	0.663284	[0.638, 0.689]	0.655262	[0.638, 0.671]	0.687915	[0.672, 0.701]	0.68905	[0.659, 0.714]	0.706911	[0.677, 0.733]	0.692923	[0.663, 0.724]	0.679222	[0.656, 0.7]	0.692177	[0.668, 0.718]
	AE	0.633424	[0.593, 0.672]	0.696628	[0.647, 0.74]	0.691249	[0.664, 0.718]	0.672836	[0.664, 0.681]	0.698856	[0.675, 0.721]	0.647953	[0.556, 0.748]	0.64114	[0.616, 0.665]	0.751565	[0.718, 0.783]	0.792282	[0.705, 0.862]	0.648691	[0.625, 0.671]	0.648783	[0.623, 0.674]	0.638222	[0.622, 0.655]	0.680049	[0.666, 0.695]	0.669156	[0.641, 0.696]	0.686767	[0.656, 0.716]	0.7011	[0.668, 0.731]	0.681229	[0.659, 0.704]	0.692351	[0.667, 0.715]
	DS	0.688066	[0.65, 0.729]	0.693344	[0.646, 0.739]	0.69707	[0.67, 0.726]	0.683396	[0.674, 0.692]	0.710871	[0.688, 0.733]	0.667046	[0.572, 0.759]	0.667899	[0.643, 0.693]	0.756132	[0.723, 0.787]	0.795924	[0.713, 0.866]	0.65758	[0.635, 0.677]	0.662311	[0.637, 0.688]	0.64853	[0.632, 0.665]	0.691347	[0.678, 0.706]	0.686634	[0.658, 0.712]	0.704302	[0.676, 0.733]	0.706649	[0.674, 0.736]	0.685483	[0.664, 0.705]	0.692718	[0.667, 0.716]
	SL	0.687107	[0.649, 0.725]	0.701325	[0.655, 0.746]	0.699442	[0.671, 0.727]	0.687111	[0.678, 0.696]	0.711373	[0.688, 0.733]	0.659846	[0.552, 0.751]	0.673106	[0.648, 0.699]	0.749132	[0.714, 0.781]	0.791435	[0.702, 0.867]	0.658085	[0.636, 0.679]	0.665068	[0.64, 0.69]	0.65308	[0.637, 0.67]	0.694233	[0.679, 0.708]	0.689251	[0.661, 0.716]	0.702871	[0.673, 0.731]	0.703236	[0.672, 0.731]	0.686126	[0.664, 0.706]	0.694444	[0.669, 0.721]
88 Covariates	ROPRO	0.660873	[0.622, 0.702]	0.69431	[0.648, 0.742]	0.700294	[0.672, 0.73]	0.677357	[0.669, 0.687]	0.704844	[0.679, 0.728]	0.663676	[0.558, 0.752]	0.684058	[0.658, 0.71]	0.742706	[0.704, 0.777]	0.781509	[0.703, 0.844]	0.644083	[0.623, 0.667]	0.652946	[0.628, 0.678]	0.642884	[0.625, 0.659]	0.687836	[0.673, 0.702]	0.669	[0.638, 0.698]	0.706144	[0.678, 0.732]	0.733595	[0.704, 0.76]	0.691593	[0.671, 0.713]	0.687524	[0.662, 0.713]
	Cox + Elastic Net	0.654201	[0.613, 0.695]	0.686493	[0.638, 0.734]	0.700106	[0.672, 0.727]	0.674336	[0.666, 0.684]	0.697298	[0.674, 0.721]	0.637292	[0.53, 0.738]	0.680291	[0.653, 0.705]	0.73503	[0.702, 0.768]	0.783644	[0.694, 0.86]	0.646787	[0.627, 0.669]	0.6496	[0.624, 0.675]	0.636262	[0.619, 0.654]	0.688012	[0.674, 0.701]	0.666492	[0.635, 0.697]	0.670711	[0.64, 0.7]	0.730041	[0.703, 0.757]	0.679528	[0.658, 0.702]	0.684816	[0.658, 0.709]
	Cox + Lasso	0.655697	[0.612, 0.697]	0.689815	[0.634, 0.738]	0.699576	[0.67, 0.728]	0.674902	[0.666, 0.684]	0.69793	[0.675, 0.719]	0.637195	[0.521, 0.733]	0.679913	[0.655, 0.705]	0.735675	[0.698, 0.77]	0.783343	[0.692, 0.86]	0.647802	[0.625, 0.667]	0.65006	[0.624, 0.676]	0.635472	[0.619, 0.651]	0.687936	[0.674, 0.702]	0.667874	[0.64, 0.696]	0.670051	[0.639, 0.699]	0.72995	[0.701, 0.759]	0.680942	[0.658, 0.701]	0.684466	[0.66, 0.711]
	Cox + Ridge regression	0.642331	[0.598, 0.681]	0.692193	[0.643, 0.738]	0.699624	[0.672, 0.727]	0.673769	[0.665, 0.682]	0.695788	[0.673, 0.719]	0.63568	[0.536, 0.732]	0.6767	[0.652, 0.702]	0.730892	[0.695, 0.764]	0.778438	[0.694, 0.854]	0.649006	[0.627, 0.67]	0.64873	[0.622, 0.673]	0.638358	[0.62, 0.655]	0.68824	[0.674, 0.702]	0.67027	[0.641, 0.699]	0.66568	[0.636, 0.696]	0.726857	[0.698, 0.755]	0.675797	[0.655, 0.697]	0.68554	[0.659, 0.709]
	GB	0.666467	[0.627, 0.708]	0.714336	[0.664, 0.755]	0.698358	[0.67, 0.727]	0.670692	[0.662, 0.68]	0.693618	[0.668, 0.715]	0.638892	[0.521, 0.745]	0.704678	[0.679, 0.729]	0.740599	[0.702, 0.772]	0.78398	[0.706, 0.855]	0.648062	[0.626, 0.669]	0.652474	[0.629, 0.678]	0.642466	[0.626, 0.658]	0.68938	[0.675, 0.703]	0.673083	[0.644, 0.705]	0.690846	[0.661, 0.715]	0.731669	[0.704, 0.759]	0.679158	[0.655, 0.699]	0.684228	[0.659, 0.709]
	RSF	0.660656	[0.619, 0.7]	0.706703	[0.658, 0.749]	0.704539	[0.675, 0.732]	0.672827	[0.664, 0.681]	0.693108	[0.669, 0.716]	0.659702	[0.558, 0.747]	0.677097	[0.652, 0.701]	0.715408	[0.679, 0.751]	0.773654	[0.685, 0.853]	0.649313	[0.626, 0.67]	0.65667	[0.631, 0.68]	0.64991	[0.632, 0.667]	0.683218	[0.669, 0.697]	0.681739	[0.652, 0.71]	0.671275	[0.64, 0.697]	0.707125	[0.678, 0.737]	0.667195	[0.645, 0.69]	0.677212	[0.65, 0.703]
	AE	0.643167	[0.605, 0.683]	0.689124	[0.641, 0.734]	0.692365	[0.661, 0.72]	0.665861	[0.657, 0.675]	0.692715	[0.669, 0.717]	0.626415	[0.516, 0.724]	0.675377	[0.651, 0.7]	0.727085	[0.692, 0.76]	0.771135	[0.68, 0.848]	0.641876	[0.62, 0.663]	0.643302	[0.62, 0.668]	0.63116	[0.613, 0.648]	0.684148	[0.67, 0.698]	0.664959	[0.635, 0.694]	0.663628	[0.634, 0.694]	0.729681	[0.7, 0.759]	0.669634	[0.648, 0.691]	0.686256	[0.661, 0.711]
	DS	0.683648	[0.644, 0.721]	0.695515	[0.647, 0.74]	0.704545	[0.675, 0.731]	0.677456	[0.669, 0.686]	0.702108	[0.679, 0.725]	0.65076	[0.538, 0.751]	0.708505	[0.682, 0.733]	0.741098	[0.707, 0.776]	0.790794	[0.705, 0.861]	0.653807	[0.633, 0.676]	0.655088	[0.63, 0.679]	0.644914	[0.628, 0.662]	0.689388	[0.675, 0.703]	0.683418	[0.656, 0.711]	0.68069	[0.65, 0.711]	0.722496	[0.692, 0.753]	0.674001	[0.652, 0.695]	0.692432	[0.668, 0.717]
	SL	0.69274	[0.654, 0.731]	0.708176	[0.659, 0.753]	0.705449	[0.675, 0.734]	0.681635	[0.673, 0.691]	0.706259	[0.683, 0.728]	0.648753	[0.542, 0.744]	0.702174	[0.677, 0.725]	0.735641	[0.701, 0.771]	0.786115	[0.703, 0.861]	0.656084	[0.634, 0.677]	0.656296	[0.633, 0.68]	0.64853	[0.63, 0.665]	0.693067	[0.679, 0.707]	0.679301	[0.651, 0.707]	0.694088	[0.664, 0.722]	0.726108	[0.697, 0.755]	0.682947	[0.66, 0.704]	0.691957	[0.667, 0.716]
		0.659129	#DIV/0!	0.702423	#DIV/0!	0.697599	#DIV/0!	0.678278	#DIV/0!	0.699788	#DIV/0!	0.650623	#DIV/0!	0.67408	#DIV/0!	0.741001	#DIV/0!	0.787701	#DIV/0!	0.649838	#DIV/0!	0.655375	#DIV/0!	0.643755	#DIV/0!	0.687238	#DIV/0!	0.676586	#DIV/0!	0.694067	#DIV/0!	0.713104	#DIV/0!	0.683787	#DIV/0!	0.689916	#DIV/0!
